# Supplementary material for: Exploring the Influence of VDR Genetic Variants TaqI, ApaI, and FokI on COVID-19 Severity and Long-COVID-19 Symptoms
Source: MDPI journal article supplement (doi:10.3390/jpm13121663), 2023-11-28
Supplement: s1 [file s1]

**Supplementary Table S1.** Distribution of Severity among Patients' Characteristics other than VDR genotyping

| <b>Variable</b>          | <b>Asymptomatic<br/>N (%)</b> | <b>Minor Illness<br/>N (%)</b> | <b>Moderate Illness<br/>N (%)</b> | <b>Sever Illness<br/>N (%)</b> | <b>P Value</b> |
|--------------------------|-------------------------------|--------------------------------|-----------------------------------|--------------------------------|----------------|
| <b>Gender</b>            |                               |                                |                                   |                                | 0.269          |
| Male                     | 21 (41.2)                     | 12 (25.0)                      | 0 (0.0)                           | 0 (0.0)                        |                |
| Female                   | 30 (58.8)                     | 36 (75.0)                      | 1 (100.0)                         | 1 (100.0)                      |                |
| <b>Age (Years Old)</b>   |                               |                                |                                   |                                | <b>0.000</b>   |
| Young Age (15 – 47)      | 42 (82.4)                     | 32 (66.7)                      | 0 (0.0)                           | 1 (0.0)                        |                |
| Middle Age (48 – 63)     | 9 (17.6)                      | 14 (29.2)                      | 0 (0.0)                           | 0 (0.0)                        |                |
| Old Age (64 and older)   | 0 (0.0)                       | 2 (4.2)                        | 1 (100.0)                         | 0 (0.0)                        |                |
| <b>BMI</b>               |                               |                                |                                   |                                | <b>0.000</b>   |
| Normal Weight            | 29 (56.9)                     | 26 (54.2)                      | 0 (0.0)                           | 0 (0.0)                        |                |
| Underweight              | 2 (3.9)                       | 5 (10.4)                       | 0 (0.0)                           | 0 (0.0)                        |                |
| Overweight               | 19 (37.3)                     | 16 (33.3)                      | 1 (100.0)                         | 0 (0.0)                        |                |
| Obese                    | 1 (2.0)                       | 1 (2.1)                        | 0 (0.0)                           | 1 (100.0)                      |                |
| <b>Smoking Level</b>     |                               |                                |                                   |                                | 0.995          |
| Non-Smoking              | 34 (66.7)                     | 34 (70.8)                      | 1 (100.0)                         | 1 (100.0)                      |                |
| Light Smoking            | 12 (23.5)                     | 8 (16.7)                       | 0 (0.0)                           | 0 (0.0)                        |                |
| Moderate Smoking         | 4 (7.8)                       | 5 (10.4)                       | 0 (0.0)                           | 0 (0.0)                        |                |
| Heavy Smoking            | 1 (2.0)                       | 1 (2.1)                        | 0 (0.0)                           | 0 (0.0)                        |                |
| <b>Diabetes Mellitus</b> |                               |                                |                                   |                                | 0.086          |
| Yes                      | 6 (11.8)                      | 7 (14.6)                       | 1 (100.0)                         | 0 (0.0)                        |                |
| No                       | 45 (88.2)                     | 41 (85.4)                      | 0 (0.0)                           | 1 (100.0)                      |                |
| <b>Hypertension?</b>     |                               |                                |                                   |                                | 0.051          |
| Yes                      | 5 (9.8)                       | 6 (12.5)                       | 1 (100.0)                         | 0 (0.0)                        |                |
| No                       | 46 (90.2)                     | 42 (87.5)                      | 0 (0.0)                           | 1 (100.0)                      |                |

|                                |           |           |           |           |              |
|--------------------------------|-----------|-----------|-----------|-----------|--------------|
| <b>Cardiovascular Disease?</b> |           |           |           |           | <b>0.001</b> |
| Yes                            | 2 (3.9)   | 3 (6.3)   | 1 (100.0) | 0 (0.0)   |              |
| No                             | 49 (96.1) | 45 (93.8) | 0 (0.0)   | 1 (100.0) |              |
| <b>Comorbidities?</b>          |           |           |           |           | 0.098        |
| Yes                            | 7 (13.7)  | 12 (25.0) | 1 (100.0) | 0 (0.0)   |              |
| No                             | 44 (86.3) | 36 (75.0) | 0 (0.0)   | 1 (100.0) |              |

\* P. values obtained from Chi-Square Test

\* Bold *P* values are statistically significant (<0.05).

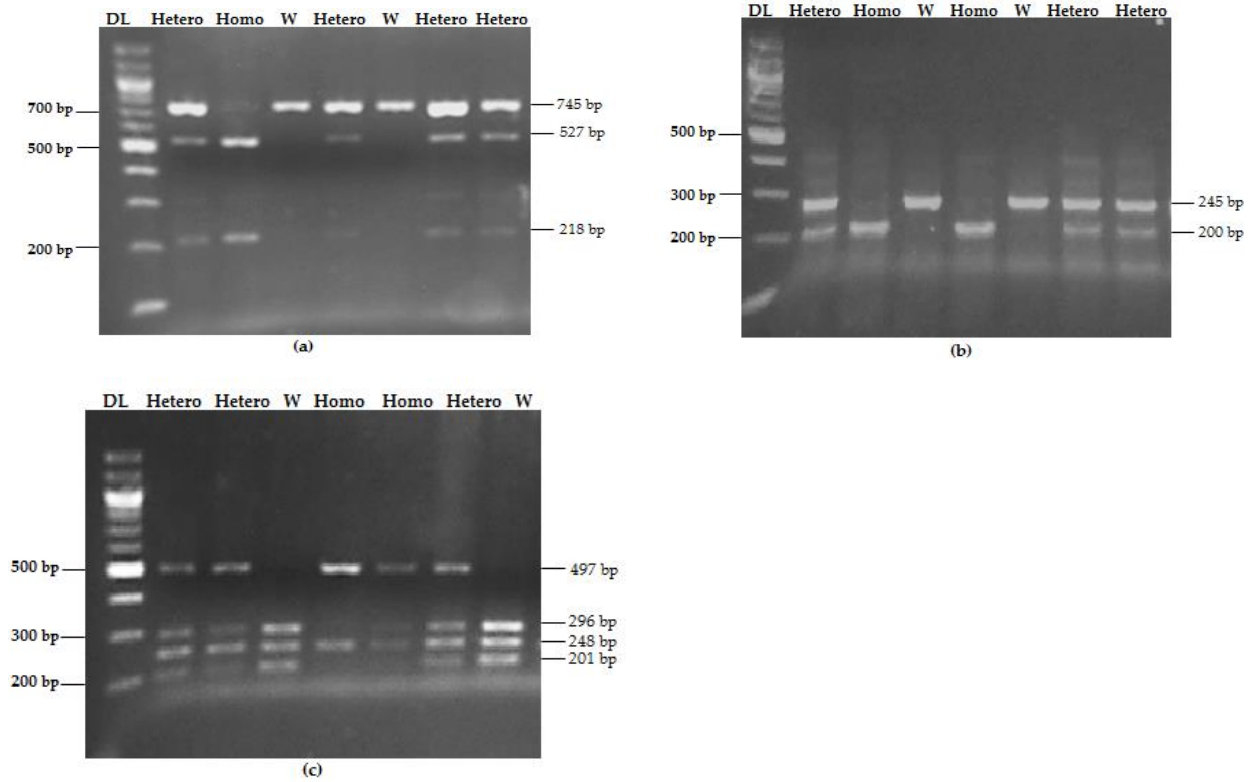

**Supplementary Figure S1.** Gel electrophoresis of RFLP products of *Apal*, *FokI*, and *TaqI* polymorphisms. (a) Genotyping results for VDR *Apal*; (b) Genotyping results for VDR *FokI*; (c) Genotyping results for VDR *TaqI*. Hetero, Heterozygous; Homo, Homozygous; W, Wild-type; DL, DNA loading ladder.
